# Supplementary material for: Estimating the global economic benefits of physically active populations over 30 years (2020–2050)
Source: PubMed Central journal article supplement — Br J Sports Med. 2020 Nov 23;54(24):1482–7. doi: 10.1136/bjsports-2020-102590 (PMC7719903; doi:10.1136/bjsports-2020-102590), 2020-11-23
Supplement: bjsports-2020-102590supp002.pdf [file bjsports-2020-102590supp002.pdf]

Table 8: Descriptive statistics of the meta-analysis data sample.

| <b>Factor</b> | <b>Estimate description</b>                                                                                    | <b>% of estimates</b> |
|---------------|----------------------------------------------------------------------------------------------------------------|-----------------------|
| Male          | Relates to only male sample                                                                                    | 41                    |
| Female        | Relates to only female sample                                                                                  | 21                    |
| Middle age    | Relates to sample with cohort age between 45 and 65                                                            | 25                    |
| Old age       | Relates to sample with cohort age between above 65                                                             | 31                    |
| Unadj         | Is unadjusted                                                                                                  | 1                     |
| Socio         | Adjusted for socio-demographic factors                                                                         | 71                    |
| Smoking       | Adjusted for smoking                                                                                           | 72                    |
| BMI           | Adjusted for Body Mass Index                                                                                   | 55                    |
| Drinking      | Adjusted for alcohol consumption                                                                               | 46                    |
| Chronic       | Adjusted for chronic conditions (e.g. diabetes, hypertension)                                                  | 58                    |
| China         | Relates to a population sample from China                                                                      | 12                    |
| Other Asia    | Relates to a population sample from other Asian countries than China (Taiwan, Hong Kong, Japan)                | 7                     |
| USA           | Relates to a population sample from the USA                                                                    | 34                    |
| Europe        | Relates to a population sample from Europe (UK, Spain, Netherlands, Denmark, Finland, Norway, Sweden, Germany) | 42                    |
